# Supplementary material for: Low Remnant Cholesterol and In‐Hospital Bleeding Risk After Ischemic Stroke or Transient Ischemic Attack
Source: PubMed Central journal article supplement — J Am Heart Assoc. 2024 Jul 9;13(14):e034307. doi: 10.1161/JAHA.124.034307 (PMC11292780; doi:10.1161/jaha.124.034307), 2024-07-09

# **SUPPLEMENTAL MATERIAL**

**Table S1. Baseline and clinical characteristics of patients included and excluded in the final analysis.**

|                                            | Included     | Excluded     | P value |
|--------------------------------------------|--------------|--------------|---------|
| Participants, No.                          | 3222         | 273          |         |
| Sex, male, n (%)                           | 2301(71.4)   | 194(71.1)    | 0.957   |
| Age, years, mean (SD)                      | 63.01(13.06) | 64.05(14.00) | 0.21    |
| BMI, kg/m <sup>2</sup> , mean (SD)         | 24.57(3.53)  | 24.71(3.56)  | 0.617   |
| Smoking history, n (%)                     | 2454(76.2)   | 189(69.2)    | 0.112   |
| Medical history, n (%)                     |              |              |         |
| Hypertension                               | 2075(64.4)   | 178(65.2)    | 0.842   |
| Diabetes                                   | 1052(32.7)   | 102(37.4)    | 0.128   |
| Prior Stroke                               | 190(5.9)     | 23(8.4)      | 0.146   |
| Myocardial infarction                      | 73(2.6)      | 8(3.3)       | 0.648   |
| Atrial fibrillation                        | 402(12.5)    | 44(16.1)     | 0.102   |
| Lipid-lowering medication before admission | 380(18.5)    | 44(23.4)     | 0.124   |
| Lipid-lowering therapy in hospital         | 2883(89.5)   | 228(83.4)    | 0.071   |
| TOAST subtype, n (%)                       |              |              | 0.057   |
| large artery atherosclerosis               | 1304(40.5)   | 117(42.9)    |         |
| small vessel occlusion                     | 799(24.8)    | 45(16.5)     |         |
| cardioembolic stroke                       | 406(12.6)    | 44(16.1)     |         |
| other determined etiology                  | 127(3.9)     | 10(3.7)      |         |
| undetermined etiology                      | 586(18.2)    | 57(20.9)     |         |
| NIHSS                                      |              |              | 0.061   |
| mild: 0-4, n (%)                           | 1817(56.4)   | 129(47.3)    |         |
| moderate: 5-15, n (%)                      | 1156(35.9)   | 121(44.3)    |         |
| severe: 16-42, n (%)                       | 249(7.7)     | 23(8.4)      |         |

Data are presented as mean (SD), median [IQR] or number (%).

SD, standard deviation; IQR, interquartile range; BMI, body mass index; TOAST, trial of ORG 10172 in acute stroke treatment.

**Table S2. Association of remnant cholesterol <20 mg/dL at admission with in-hospital outcomes of ischemic stroke.**

|                                     | Model 1 |             |         | Model 2 |             |         | Risk difference (95% CI), % |                |
|-------------------------------------|---------|-------------|---------|---------|-------------|---------|-----------------------------|----------------|
|                                     | OR      | 95% CI      | P value | OR      | 95% CI      | P value | Model 1                     | Model 2        |
| Remnant cholesterol $\geq$ 20 mg/dL | Ref     |             |         |         |             |         |                             |                |
| Bleeding event during hospital      | 1.710   | 1.119-2.67  | 0.015   | 2.418   | 1.170-5.279 | 0.021   | 1.5 (0.3~2.7)               | 2.4 (0.5~4.2)  |
| Death in hospital                   | 1.270   | 0.731-2.279 | 0.407   | 1.814   | 0.558-6.754 | 0.341   | 0.5 (-0.5~1.3)              | 1.1 (-1.0~3.1) |

OR, odds ratio; CI, confidence interval; BMI, body mass index; TOAST, trial of ORG 10172 in acute stroke treatment; LDL, low-density lipoprotein; HDL, high-density lipoprotein; eGFR, estimated glomerular filtration rate.

Model 1 was adjusted for age and sex; model 2 was further adjusted for BMI, smoking, hypertension, diabetes, myocardial infarction, atrial fibrillation, prior stroke, eGFR, TOAST subtype, lipid-lowering before admission, intravenous thrombolytic therapy and mechanical thrombectomy, LDL cholesterol and HDL cholesterol.

**Table S3. Association of remnant cholesterol levels at admission with in-hospital outcomes after NIHSS additionally adjusted.**

|                                   | $\beta$ | OR    | 95% CI       | P value |
|-----------------------------------|---------|-------|--------------|---------|
| Remnant cholesterol 20-29.9 mg/dL |         |       |              |         |
| Bleeding event                    |         |       |              |         |
| <20 mg/dL                         | 0.921   | 2.513 | 1.089-6.594  | 0.042   |
| $\geq$ 30 mg/dL                   | 0.211   | 1.235 | 0.354-4.021  | 0.727   |
| Death in hospital                 |         |       |              |         |
| <20 mg/dL                         | 0.944   | 2.570 | 0.653-13.213 | 0.211   |
| $\geq$ 30 mg/dL                   | 0.414   | 1.513 | 0.067-14.577 | 0.740   |

OR, odds ratio; CI, confidence interval; BMI, body mass index; TOAST, trial of ORG 10172 in acute stroke treatment; LDL, low-density lipoprotein; HDL, high-density lipoprotein; eGFR, estimated glomerular filtration rate; NIHSS, National Institutes of Health Stroke Scale.

Analyses were adjusted for age, sex, BMI, smoking, hypertension, diabetes, myocardial infarction, atrial fibrillation, prior stroke, eGFR, TOAST subtype, lipid-lowering before admission, intravenous thrombolytic therapy and mechanical thrombectomy, LDL cholesterol, HDL cholesterol and NIHSS.

**Table S4. Adjusted odds ratios of remnant cholesterol levels at admission for in-hospital outcomes of ischemic stroke among the imputed datasets.**

|                                   | $\beta$ | OR    | 95% CI      | P value |
|-----------------------------------|---------|-------|-------------|---------|
| Remnant cholesterol 20-29.9 mg/dL | Ref     |       |             |         |
| Bleeding event                    |         |       |             |         |
| <20 mg/dL                         | 0.583   | 1.791 | 1.011-3.175 | 0.046   |
| $\geq$ 30 mg/dL                   | 0.251   | 1.285 | 0.621-2.660 | 0.499   |
| Death in hospital                 |         |       |             |         |
| <20 mg/dL                         | 0.157   | 1.170 | 0.553-2.474 | 0.681   |
| $\geq$ 30 mg/dL                   | 0.063   | 1.065 | 0.383-2.963 | 0.903   |

OR, odds ratio; CI, confidence interval; BMI, body mass index; TOAST, trial of ORG 10172 in acute stroke treatment; LDL, low-density lipoprotein; HDL, high-density lipoprotein; eGFR, estimated glomerular filtration rate.

Analyses were adjusted for age, sex, BMI, smoking, hypertension, diabetes, myocardial infarction, atrial fibrillation, prior stroke, eGFR, TOAST subtype, lipid-lowering before admission, intravenous thrombolytic therapy and mechanical thrombectomy, LDL cholesterol and HDL cholesterol.

Number of missing cases: BMI (n=756) and eGFR (n=45). Five-iteration imputed datasets were generated by Markov Chain Monte Carlo method.

**Table S5. Association between remnant cholesterol levels at admission and outcomes of ischemic stroke among 2883 patients with lipid-lowering medication during hospitalization.**

|                                   | Model 1 |             |         |                | Model 2 |              |         |               |
|-----------------------------------|---------|-------------|---------|----------------|---------|--------------|---------|---------------|
|                                   | OR      | 95% CI      | P value | P interaction* | OR      | 95% CI       | P value | P interaction |
| Remnant cholesterol 20-29.9 mg/dL | Ref     |             |         |                |         |              |         |               |
| Bleeding event                    |         |             |         |                |         |              |         |               |
| <20 mg/dL                         | 1.980   | 1.129-3.720 | 0.024   | 0.612          | 3.012   | 1.267-8.385  | 0.020   | 0.978         |
| ≥30 mg/dL                         | 1.326   | 0.597-2.902 | 0.479   | 0.849          | 1.387   | 0.389-4.739  | 0.598   | 0.944         |
| Death in hospital                 |         |             |         |                |         |              |         |               |
| <20 mg/dL                         | 1.378   | 0.537-4.237 | 0.534   | 0.615          | 1.256   | 0.212-11.162 | 0.814   | 0.565         |
| ≥30 mg/dL                         | 1.075   | 0.218-4.431 | 0.922   | 0.857          | - †     | -            | -       | -             |

OR, odds ratio; CI, confidence interval; BMI, body mass index; TOAST, trial of ORG 10172 in acute stroke treatment; LDL, low-density lipoprotein; HDL, high-density lipoprotein; eGFR, estimated glomerular filtration rate.

Model 1 was adjusted for age and sex; model 2 was further adjusted for BMI, smoking, hypertension, diabetes, myocardial infarction, atrial fibrillation, prior stroke, eGFR, TOAST subtype, lipid-lowering before admission, intravenous thrombolytic therapy and mechanical thrombectomy, LDL cholesterol and HDL cholesterol.

\*P interaction was calculated with the interaction term of remnant cholesterol group (middle/low/high) and lipid-lowering medication use in hospital (yes/no) fitted in the model among 3,222 patients.

† unrobust variance estimation.

**Table S6. Subgroup analysis of low remnant cholesterol levels at admission with bleeding event.**

|                                        | OR    | 95% CI      | P value | P <sub>interaction</sub> |
|----------------------------------------|-------|-------------|---------|--------------------------|
| Non-smoking (Ref: $\geq 20$ mg/dL)     |       |             |         | 0.413                    |
| <20 mg/dL                              | 2.382 | 1.064-6.063 | 0.047   |                          |
| Current smoking (Ref: $\geq 20$ mg/dL) |       |             |         |                          |
| <20 mg/dL                              | 1.480 | 1.097-2.497 | 0.031   |                          |
| Non-obesity (Ref: $\geq 20$ mg/dL)     |       |             |         | 0.827                    |
| <20 mg/dL                              | 1.985 | 1.127-3.669 | 0.022   |                          |
| Obesity (Ref: $\geq 20$ mg/dL)         |       |             |         |                          |
| <20 mg/dL                              | 1.603 | 1.043-2.351 | 0.043   |                          |

OR, odds ratio; CI, confidence interval; BMI, body mass index; TOAST, trial of ORG 10172 in acute stroke treatment; LDL, low-density lipoprotein; HDL, high-density lipoprotein; eGFR, estimated glomerular filtration rate.

Analyses were adjusted for age, sex, BMI, smoking, hypertension, diabetes, myocardial infarction, atrial fibrillation, prior stroke, eGFR, TOAST subtype, lipid-lowering before admission, intravenous thrombolytic therapy and mechanical thrombectomy, LDL cholesterol, HDL cholesterol, if not stratified.

**Table S7. Risk for bleeding events according to remnant cholesterol and LDL cholesterol levels.**

|                                | Model 1             |         | Model 2              |         |
|--------------------------------|---------------------|---------|----------------------|---------|
|                                | OR (95% CI)         | P value | OR (95% CI)          | P value |
| Moderate LDL-C and high RC     | Ref                 |         |                      |         |
| Bleeding event during hospital |                     |         |                      |         |
| Moderate LDL-C and low RC      | 1.985 (1.090-3.824) | 0.031   | 2.190 (0.801-7.015)  | 0.148   |
| Low LDL-C and high RC          | 0.417 (0.023-2.098) | 0.400   | 0.934 (0.049-5.453)  | 0.950   |
| Low LDL-C and low RC           | 3.180 (1.648-6.367) | 0.001   | 7.030 (2.570-22.573) | <0.001  |
| High LDL-C and high RC         | 2.356 (1.136-4.941) | 0.021   | 3.052 (0.944-10.607) | 0.064   |
| High LDL-C and low RC          | 1.905 (0.665-4.842) | 0.195   | 4.046 (0.934-16.527) | 0.050   |

OR, odds ratio; CI, confidence interval; LDL-C, low-density lipoprotein cholesterol; RC, remnant cholesterol.

Model 1 was adjusted for age and sex; model 2 was further adjusted for BMI, smoking, hypertension, diabetes, myocardial infarction, atrial fibrillation, prior stroke, eGFR, TOAST subtype, lipid-lowering before admission, intravenous thrombolytic therapy and mechanical thrombectomy, and HDL cholesterol.



**Table S8. Risk for bleeding events according to remnant cholesterol stratified by LDL cholesterol levels.**

|                                     | OR    | 95% CI       | P value |
|-------------------------------------|-------|--------------|---------|
| LDL cholesterol <70 mg/dL           |       |              |         |
| Remnant cholesterol $\geq$ 20 mg/dL | Ref   |              |         |
| Remnant cholesterol <20 mg/dL       | 7.877 | 1.630-14.801 | 0.045   |
| LDL cholesterol 70-129.9 mg/dL      |       |              |         |
| Remnant cholesterol $\geq$ 20 mg/dL | Ref   |              |         |
| Remnant cholesterol <20 mg/dL       | 1.908 | 1.042-3.691  | 0.043   |
| LDL cholesterol $\geq$ 130 mg/dL    |       |              |         |
| Remnant cholesterol $\geq$ 20 mg/dL | Ref   |              |         |
| Remnant cholesterol <20 mg/dL       | 0.785 | 0.275-1.973  | 0.625   |

OR, odds ratio; CI, confidence interval; LDL, low-density lipoprotein

Analysis was adjusted for age, sex, BMI, smoking, hypertension, diabetes, myocardial infarction, atrial fibrillation, prior stroke, eGFR, TOAST subtype, lipid-lowering before admission, intravenous thrombolytic therapy and mechanical thrombectomy, and HDL cholesterol.

**Figure S1. Absolute risk of in-hospital outcomes of ischemic stroke by remnant cholesterol at admission.**

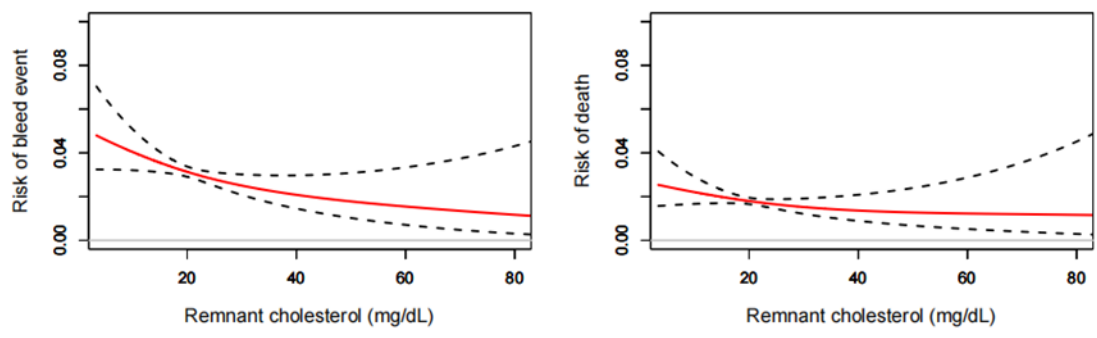

Supplement: JAH3-13-e034307-s001.pdf [file JAH3-13-e034307-s001.pdf]
